# Supplementary material for: Forebrain microglia from wild-type but not adult 5xFAD mice prevent amyloid-β plaque formation in organotypic hippocampal slice cultures
Source: PubMed Central journal article supplement (PMC4586757; doi:10.1038/srep14624), 2015-09-29

## Supplementary Material

### Forebrain microglia from wild-type but not adult 5xFAD mice prevent amyloid- $\beta$ plaque formation in organotypic hippocampal slice cultures

**Sabine Hellwig, MD<sup>1\*</sup>, Annette Masuch, PhD<sup>1\*</sup>, Sigrun Nestel<sup>2</sup>, Natalie Katzmarski<sup>3</sup>**

**Melanie Meyer-Luehmann, PhD<sup>3</sup>, Knut Biber, PhD<sup>1,4,#</sup>**

<sup>1</sup>Department of Psychiatry and Psychotherapy, <sup>2</sup>Department of Neuroanatomy, <sup>3</sup>Department of Neurology, University of Freiburg, Freiburg, Germany. <sup>4</sup>Department of Neuroscience, University Medical Center Groningen, University of Groningen, Groningen, The Netherlands.

\* These authors contributed equally to the study.

## Figure Legends

### **Supplementary Figure 1 Morphological comparison of replenished microglia isolated from the forebrain of juvenile or young adult wild type or 5xFAD mice.**

Single cell 3D reconstruction of replenished Iba1-labeled microglia isolated from 5-week- **(A, C)** or 6-month-old **(B, D)** mice. Comparison of morphometric parameters “number of branch points” and “total process length” **(E)**, n=10 cells from 3 different OHSC per group) illustrated comparable levels of ramification. Scale bar: 10  $\mu\text{m}$ .

### **Supplementary Figure 2 Analysis of synthetic amyloid $\beta_{1-42}$ preparations.**

**(A)** Analysis by dot blot revealed A11 immunoreactivity only in the brain homogenate of a plaque-containing 5XFAD mouse and no A11 immunoreactivity in the unlabelled nor labeled synthetic A $\beta$  preparation. Conversely, OC immunoreactivity was seen in synthetic A $\beta$  preparations, indicating the presence of fibrillary material in the used A $\beta$  solutions. **(B)** These findings were confirmed by EM experiments were several fibrils were seen in FAM-labeled A $\beta_{1-42}$  solution. Asterisks mark single fibrils. Scale bar: 250 nm.

# Supplementary Figure 1

juvenile

young adult

wild type

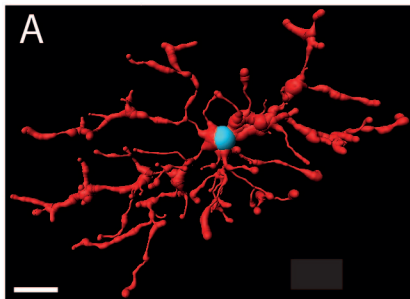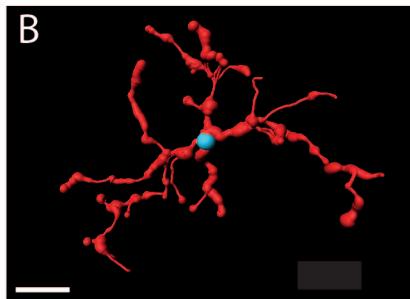

5xFAD

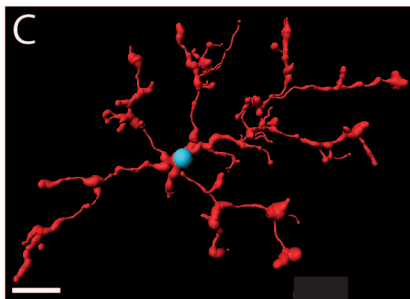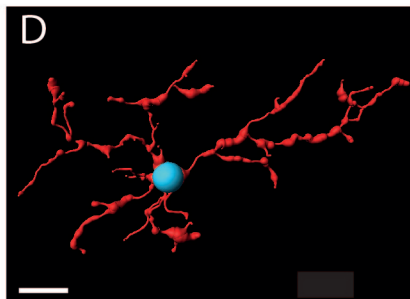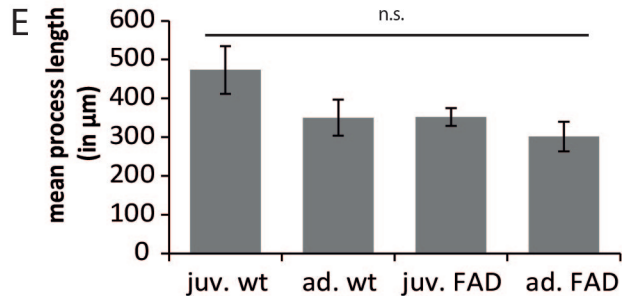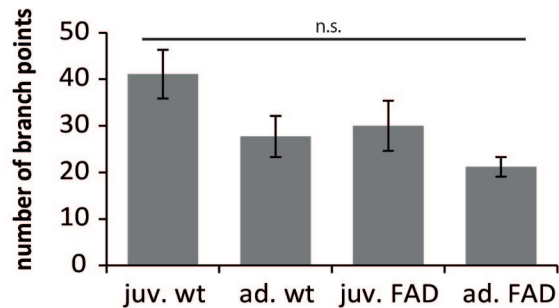

A

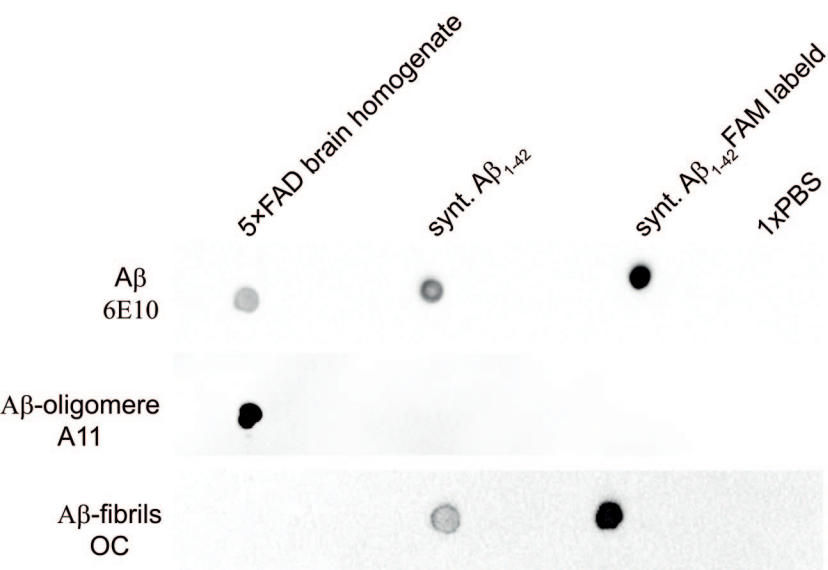

B

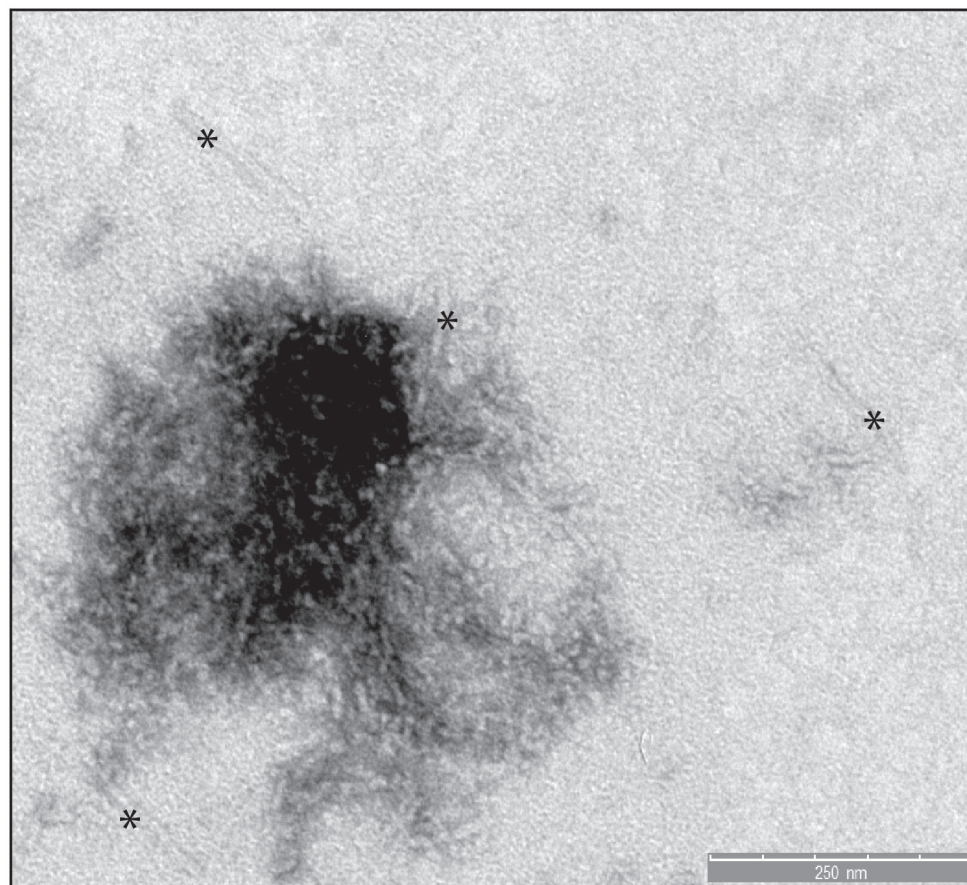

Supplement: srep14624-s1.pdf [file srep14624-s1.pdf]
